# Supplementary material for: Ultrafast lithium energy storage enabled by interfacial construction of interlayer-expanded MoS2/N-doped carbon nanowires
Source: Royal Society of Chemistry journal article supplement (doi:10.1039/c8ta04852e), 2018-01-01
Supplement: c8ta04852e1.pdf [file c8ta04852e1.pdf]

## Supporting Information for

### **Ultrafast lithium energy storage enabled by interfacial constructing interlayer-expanded MoS<sub>2</sub>/N-doped carbon nanowires**

Huanhuan Sun <sup>a</sup>, Jian-Gan Wang <sup>a\*</sup>, Yu Zhang <sup>b\*</sup>, Wei Hua <sup>a</sup>, Yueying Li <sup>a</sup>, and  
Huanyan Liu <sup>a</sup>

<sup>a</sup> State Key Laboratory of Solidification Processing, Center for Nano Energy Materials,  
School of Materials Science and Engineering, Northwestern Polytechnical University  
and Shaanxi Joint Lab of Graphene (NPU), Xi'an 710072, China

<sup>b</sup> Department of Chemical and Biomolecular Engineering, The Hong Kong University  
of Science & Technology, Clear Water Bay, Kowloon, Hong Kong, China

\*Corresponding Author E-mail: keyuzhang@ust.hk (Y. Zhang);

wangjiangan@nwpu.edu.cn (J.-G. Wang)

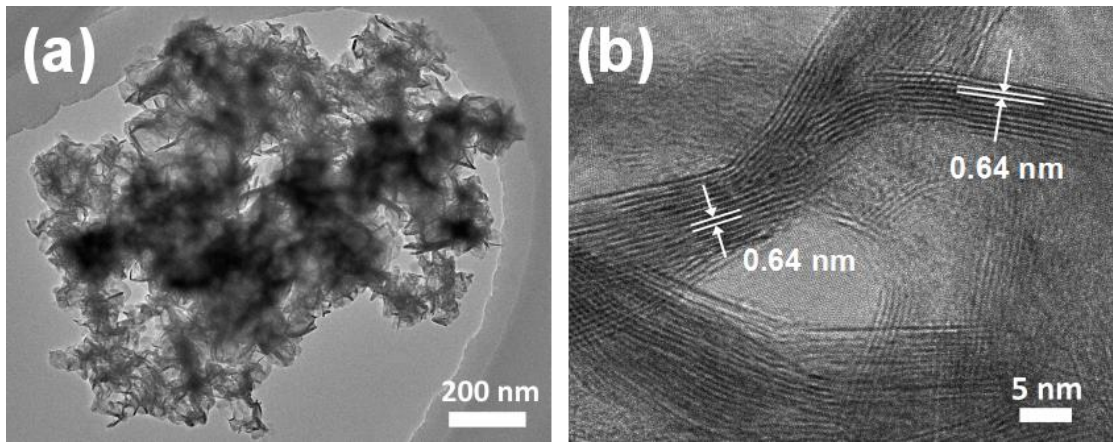

**Fig. S1.** TEM and HRTEM images of pure MoS<sub>2</sub>.

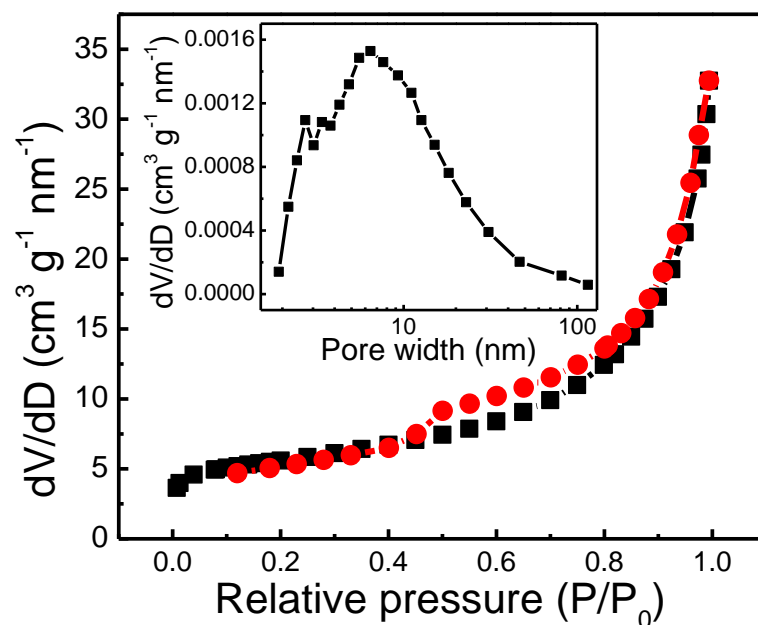

**Fig. S2.** N<sub>2</sub> adsorption-desorption isotherms and pore size distribution (the inset) of pure MoS<sub>2</sub>.

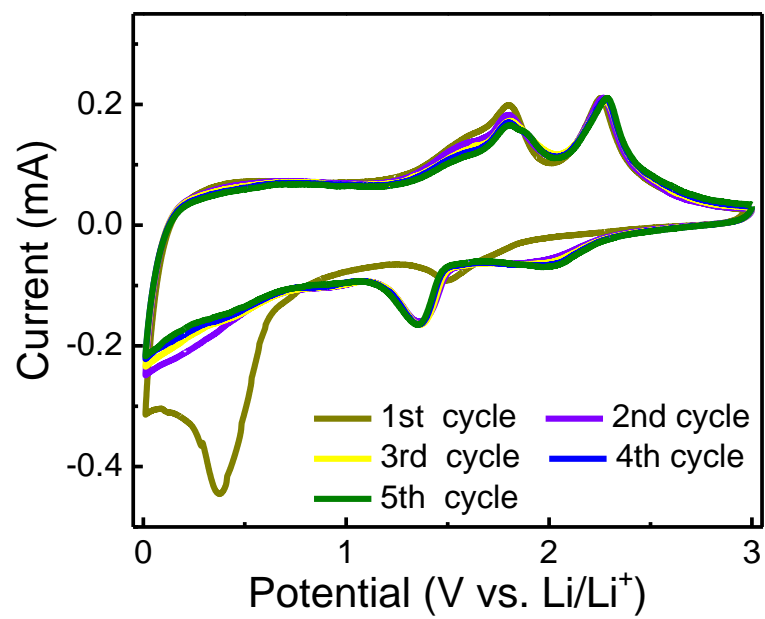

**Fig. S3.** CV curves of pure MoS<sub>2</sub> electrode in the first five cycles.

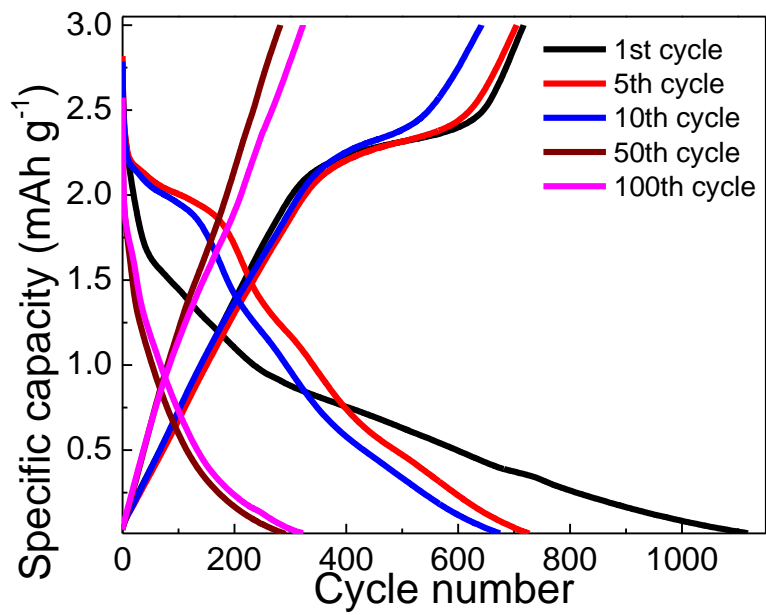

**Fig. S4.** Galvanostatic charge/discharge profiles of pure MoS<sub>2</sub> electrode at different cycles.

μ

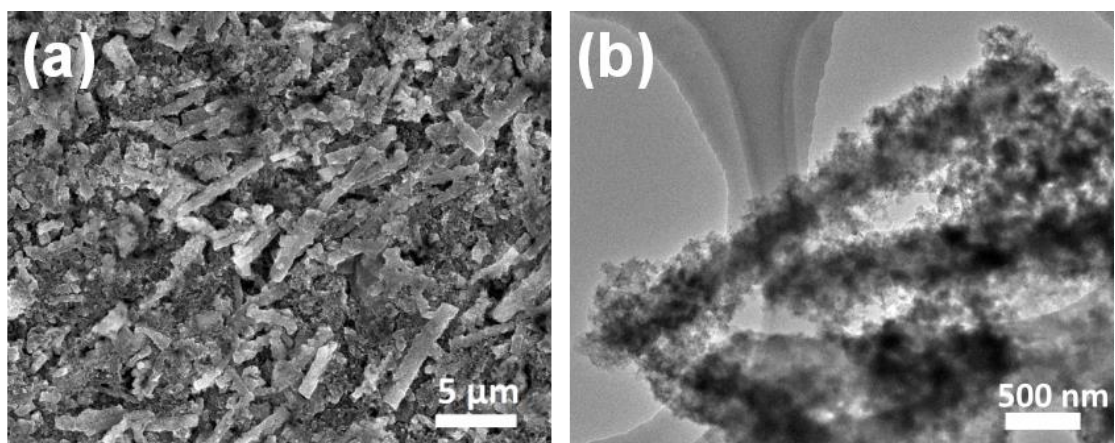

**Fig. S5.** (a) SEM and (b) TEM images of images of MoS<sub>2</sub>/N-C NWs after 100 cycles.

**Table S1.** Li-ion storage comparison of MoS<sub>2</sub>-based materials.

| Sample                                       | Specific Capacity at 0.1 A g <sup>-1</sup> (mAh g <sup>-1</sup> ) | Rate capability at different current densities relative to the initial value |                     |                     |                      | Ref.      |
|----------------------------------------------|-------------------------------------------------------------------|------------------------------------------------------------------------------|---------------------|---------------------|----------------------|-----------|
|                                              |                                                                   | 1 A g <sup>-1</sup>                                                          | 2 A g <sup>-1</sup> | 5 A g <sup>-1</sup> | 10 A g <sup>-1</sup> |           |
| TiO <sub>2</sub> @Carbon@MoS <sub>2</sub>    | 925                                                               | 81.7 %                                                                       | 72.4 %              | -                   | -                    | 1         |
| MoS <sub>2</sub> /CMK-3                      | 893                                                               | 79.8%                                                                        | 66.2%               | -                   | -                    | 2         |
| MoS <sub>2</sub> /N-Carbon                   | 1299                                                              | 46.7 %                                                                       | 42.7 %              | 38 %                | 33.1 %               | 3         |
| MoS <sub>2</sub> /C                          | 820                                                               | 62.2 %                                                                       | 55.7 %              | -                   | -                    | 4         |
| MoS <sub>2</sub> /C                          | 944                                                               | 80.7%                                                                        | 75.3%               | 61%                 | -                    | 5         |
| MoS <sub>2</sub> /N-rGO film                 | 1109                                                              | 78 %                                                                         | 70.8 %              | 64 %                | -                    | 6         |
| rGO/MoS <sub>2</sub> /N-rGO                  | 770                                                               | 76.5 %                                                                       | 68.6 %              | -                   | -                    | 7         |
| MoS <sub>2</sub> / rGO                       | 1077                                                              | 82.6 %                                                                       | -                   | -                   | -                    | 8         |
| MoS <sub>2</sub> @carbon                     | 1110                                                              | 65.3 %                                                                       | 54.1 %              | 40.5 %              | -                    | 9         |
| MoS <sub>2</sub> /graphene                   | 825                                                               | 69.2%                                                                        | -                   | -                   | -                    | 10        |
| MoS <sub>2</sub> /C                          | 1127                                                              | 78 %                                                                         | 62.9 %              | 42.6 %              | 22.2 %               | 11        |
| MoS <sub>2</sub> /graphene                   | 854                                                               | 73%                                                                          | -                   | 51.1%               | 38.8%                | 12        |
| MoS <sub>2</sub> /TiO <sub>2</sub> nanosheet | 990                                                               | 70.7 %                                                                       | -                   | 57.1 %              | -                    | 13        |
| MoS <sub>2</sub> /Carbon                     | 900                                                               | 66.7 %                                                                       | 50.5 %              | -                   | -                    | 14        |
| MoS <sub>2</sub> /C                          | 900                                                               | 77.8%                                                                        | -                   | -                   | -                    | 15        |
| MoS <sub>2</sub> /C                          | 653                                                               | 78.5 %                                                                       | 67.3 %              | 51.2 %              | -                    | 16        |
| MoS <sub>2</sub> @MoO <sub>3</sub>           | 929                                                               | 41.3 %                                                                       | -                   | -                   | -                    | 17        |
| MoS <sub>2</sub> /N-C                        | 840                                                               | 83.7 %                                                                       | 76.7 %              | 71.4 %              | 53.9 %               | This work |

## References

1. S. Wang, B. Y. Guan, L. Yu and X. W. D. Lou, *Adv Mater*, 2017, **29**, 1702724.
2. X. Xu, Z. Fan, X. Yu, S. Ding, D. Yu and X. W. D. Lou, *Adv. Energy Mater.*, 2014, **4**, 1400902
3. Z. Chen, H. Xie, L. Hu, M. Chen and L. Wu, *J. Mater. Chem. A*, 2017, **5**, 22726-22734.
4. R. Zhou, J.-G. Wang, H. Liu, H. Liu, D. Jin, X. Liu, C. Shen, K. Xie and B. Wei, *Materials*, 2017, **10**, 174.
5. Y. Wang, L. Yu and X. W. D. Lou, *Angew. Chem. Int. Ed.*, 2016, **55**, 7423–7426.
6. T. T. Shan, S. Xin, Y. You, H. P. Cong, S. H. Yu and A. Manthiram, *Angew. Chem. Int. Ed.*, 2016, **128**, 12975-12980.
7. B. Chen, Y. Meng, F. He, E. Liu, C. Shi, C. He, L. Ma, Q. Li, J. Li and N. Zhao, *Nano Energy*, 2017, **41**, 154-163.
8. Y. Teng, H. Zhao, Z. Zhang, Z. Li, Q. Xia, Y. Zhang, L. Zhao, X. Du, Z. Du, P. Lv and K. Swierczek, *ACS Nano*, 2016, **10**, 8526-8535.
9. Y. Pan, J. Zhang and H. Lu, *Chemistry*, 2017, **23**, 9937-9945.

10. Z. Wang, T. Chen, W. Chen, K. Chang, L. Ma, G. Huang, D. Chen and J. Y. Lee, *J. Mater. Chem. A*, 2013, **1**, 2202-2210
11. J. Zhou, J. Qin, X. Zhang, C. Shi, E. Liu, J. Li, N. Zhao and C. He, *ACS Nano*, 2015, **9**, 3837-3848.
12. C. Zhu, X. Mu, P. A. v. Aken, Y. Yu and J. Maier, *Angew. Chem. Int. Ed.*, 2014, **53**, 2152–2156.
13. Y. Zhou, Y. Liu, W. Zhao, F. Xie, R. Xu, B. Li, X. Zhou and H. Shen, *J. Mater. Chem. A*, 2016, **4**, 5932-5941.
14. J.-G. Wang, R. Zhou, D. Jin, K. Xie and B. Wei, *Electrochim. Acta*, 2017, **231**, 396-402.
15. L. Zhang, H. B. Wu, Y. Yan, X. Wang and X. W. D. Lou, *Energy Environ. Sci.*, 2014, **7**, 3302-3306.
16. Y. Zhang, T. He, G. Liu, L. Zu and J. Yang, *Nanoscale*, 2017, **9**, 10059-10066.
17. H. Liu, X. Chen, L. Deng, M. Ding, J. Li and X. He, *J. Mater. Chem. A*, 2016, **4**, 17764-17772.
